# Supplementary material
Source: Springer Nature journal article supplement (https://www.springermedizin.de/resource/supplementary/12985_2010_1025_MOESM4_ESM.pdf/9608974)
Supplement: MOESM4 [file 9608974]

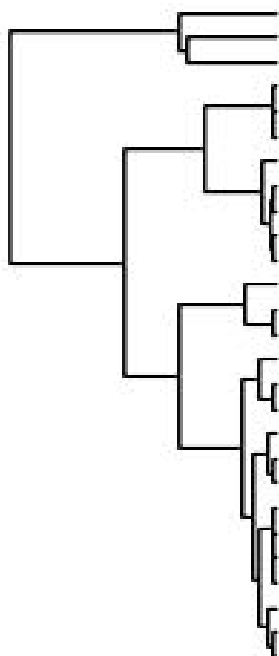

15 SB SB agroinfected  
 Pusa Ruby agroinfected  
 LA1777 healthy  
 Pusa Ruby healthy  
 15 SB SB mock infiltrated

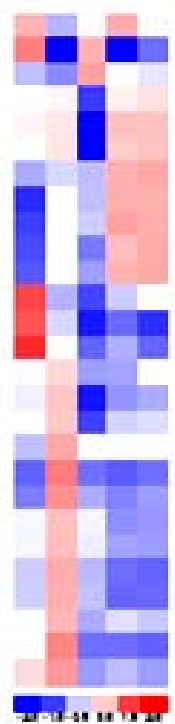

ath-miR391  
 ath-miR172b\*  
 ath-miR160a/ath-miR160b/ath-miR160c  
 ath-miR156h  
 ath-miR157a/ath-miR157b/ath-miR157c  
 ath-miR157a/ath-miR157b/ath-miR157c/ath-miR1...  
 ath-miR170  
 ath-miR169d/ath-miR169e/ath-miR169f/ath-miR1...  
 ath-miR169h/ath-miR169i/ath-miR169j/ath-miR16...  
 ath-miR169a  
 ath-miR169b/ath-miR169c  
 ath-miR825  
 ath-miR408  
 ath-miR397a  
 ath-miR447c  
 ath-miR396a  
 ath-miR396b  
 ath-miR168a/ath-miR168b  
 ath-miR319a/ath-miR319b  
 ath-miR319c  
 ath-miR172a/ath-miR172b/ath-miR172c/ath-miR1...  
 ath-miR172a/ath-miR172b  
 ath-miR172e  
 ath-miR172e  
 ath-miR162a/ath-miR162b  
 ath-miR398a/ath-miR398b/ath-miR398c  
 ath-miR398a

0.0 0.2 0.4 0.6 0.8 1.0
